# Supplementary material
Source: Springer Nature journal article supplement (https://www.springermedizin.de/resource/supplementary/12891_2013_2406_MOESM1_ESM.pdf/9509550)
Supplement: MOESM1 [file 9509550]

Written and verbal information of the trial and informed consent

**Register patient** (via CTRU 24 hour registration system)

Primary Sjögren's Syndrome  
Fulfilling AECG Criteria  
Fatigue & Dryness  
*If diagnosis using AECG criteria is  $\geq 10$  years evidence of systemic involvement is required*

Full eligibility screen (within 28 days prior to start of treatment)

**Randomise patient** (via CTRU 24 hour randomisation system)

**Baseline evaluations (within 14 days prior to start of treatment)**

Physical examination; stimulated salivary flow; Schirmers I test; questionnaires;  
Research blood samples to central lab (Bart's & London)  
Labial gland biopsy and ultrasound imaging in a subset of patients where site facilities permit (supplementary consent for labial gland biopsy and salivary gland ultrasound scan)

**Rituximab 1000mg (Day 1 & 15)**  
Methylprednisolone, chlorpheniramine,  
paracetamol  
Oral prednisolone days 2-7

**Placebo infusion (Day 1 & 15)**  
Methylprednisolone, chlorpheniramine,  
paracetamol  
Oral prednisolone days 2-7

**Follow-up evaluations at weeks 16 and 24.**

Local investigations: Blood tests, clinical assessments, questionnaires, urine dipstick and pregnancy test.  
Research blood samples to central lab (Bart's & London)  
Labial gland biopsy and ultrasound imaging in a subset of patients where site facilities permit (supplementary consent for labial gland biopsy and salivary gland ultrasound scan) at circa week 16.

**Rituximab 1000mg (Week 24 & 26)**  
Methylprednisolone, chlorpheniramine,  
paracetamol  
Oral prednisolone days 2-7

**Placebo infusion (Week 24 & 26)**  
Methylprednisolone, chlorpheniramine,  
paracetamol  
Oral prednisolone days 2-7

**Follow-up evaluations at weeks 36 and 48.**

Local investigations: Blood tests, clinical assessments, questionnaires, urine dipstick and pregnancy test.  
Research blood samples to central lab (Bart's & London). Chest X-ray and ECG at week 48.  
Labial gland biopsy and ultrasound imaging in a subset of patients where site facilities permit (supplementary consent for labial gland biopsy and salivary gland ultrasound scan) at circa week 48.

Study completed

Patient returns to routine care
